# Supplementary material
Source: publisher site journal article supplement (https://www.spandidos-publications.com/8246/downloadSupplementary)

Figure S1. SLC12A2 levels measured by (A) reverse transcription-quantitative polymerase chain reaction and (B) western blotting. \*\*P<0.01 vs. the WT group. WT, wild-type; DR, diabetic retinopathy.

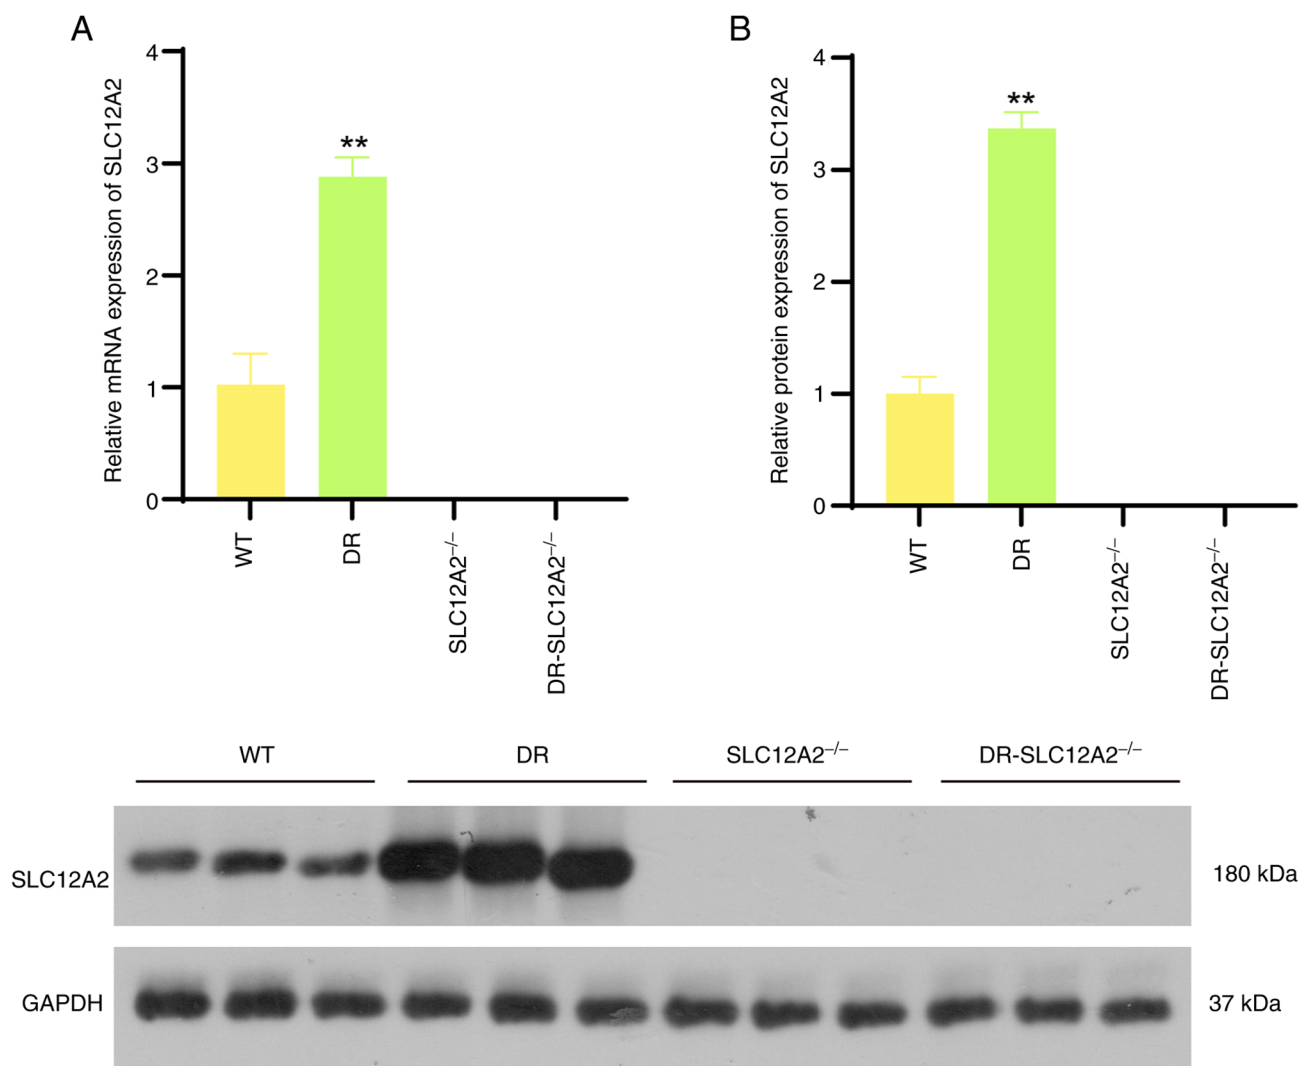

Supplement: Supplementary file 1 [file downloadSupplementary]
